# Supplementary material for: Diorganotin(iv) 4,6-dimethyl-2-pyrimidyl selenolates: synthesis, structures and their utility as molecular precursors for the preparation of SnSe2 nano-sheets and thin films
Source: Royal Society of Chemistry journal article supplement (doi:10.1039/c5ra20578f), 2016-01-01
Supplement: c5ra20578f1.pdf [file c5ra20578f1.pdf]

*Supplementary Information*

**Diorganotin(IV) 4,6-dimethyl-2-pyrimidyl selenolates: Synthesis, structures and their utility as molecular precursors for the preparation of SnSe<sub>2</sub> nano-sheets and thin films**

Adish Tyagi, G. Kedarnath, Amey Wadawale, Alpa Y. Shah, Vimal K. Jain and B. Vishwanadh

**Figure Captions:**

**Fig. S1** <sup>1</sup>H NMR spectrum of [Me<sub>2</sub>Sn{SeC<sub>4</sub>H(Me-4,6)<sub>2</sub>N<sub>2</sub>}<sub>2</sub>] (**1**) acquired in CDCl<sub>3</sub>.

**Fig. S2** <sup>13</sup>C{<sup>1</sup>H} NMR spectrum of [Me<sub>2</sub>Sn{SeC<sub>4</sub>H(Me-4,6)<sub>2</sub>N<sub>2</sub>}<sub>2</sub>] (**1**) acquired in CDCl<sub>3</sub>.

**Fig. S3** <sup>77</sup>Se{<sup>1</sup>H} NMR spectrum of [Me<sub>2</sub>Sn{SeC<sub>4</sub>H(Me-4,6)<sub>2</sub>N<sub>2</sub>}<sub>2</sub>] (**1**) acquired in CDCl<sub>3</sub>.

**Fig. S4** <sup>119</sup>Sn{<sup>1</sup>H} NMR spectrum of [Me<sub>2</sub>Sn{SeC<sub>4</sub>H(Me-4,6)<sub>2</sub>N<sub>2</sub>}<sub>2</sub>] (**1**) acquired in CDCl<sub>3</sub>.

**Fig. S5** <sup>1</sup>H NMR spectrum of [Et<sub>2</sub>Sn{SeC<sub>4</sub>H(Me-4,6)<sub>2</sub>N<sub>2</sub>}<sub>2</sub>] (**2**) acquired in CDCl<sub>3</sub>.

**Fig. S6** <sup>13</sup>C{<sup>1</sup>H} NMR spectrum of [Et<sub>2</sub>Sn{SeC<sub>4</sub>H(Me-4,6)<sub>2</sub>N<sub>2</sub>}<sub>2</sub>] (**2**) acquired in CDCl<sub>3</sub>.

**Fig. S7** <sup>77</sup>Se{<sup>1</sup>H} NMR spectrum of [Et<sub>2</sub>Sn{SeC<sub>4</sub>H(Me-4,6)<sub>2</sub>N<sub>2</sub>}<sub>2</sub>] (**2**) acquired in CDCl<sub>3</sub>.

**Fig. S8** <sup>119</sup>Sn{<sup>1</sup>H} NMR spectrum of [Et<sub>2</sub>Sn{SeC<sub>4</sub>H(Me-4,6)<sub>2</sub>N<sub>2</sub>}<sub>2</sub>] (**2**) acquired in CDCl<sub>3</sub>.

**Fig. S9** <sup>1</sup>H NMR spectrum of [<sup>n</sup>Bu<sub>2</sub>Sn{SeC<sub>4</sub>H(Me-4,6)<sub>2</sub>N<sub>2</sub>}<sub>2</sub>] (**3**) acquired in CDCl<sub>3</sub>.

**Fig. S10** <sup>13</sup>C{<sup>1</sup>H} NMR spectrum of [<sup>n</sup>Bu<sub>2</sub>Sn{SeC<sub>4</sub>H(Me-4,6)<sub>2</sub>N<sub>2</sub>}<sub>2</sub>] (**3**) acquired in CDCl<sub>3</sub>.

**Fig. S11** <sup>77</sup>Se{<sup>1</sup>H} NMR spectrum of [<sup>n</sup>Bu<sub>2</sub>Sn{SeC<sub>4</sub>H(Me-4,6)<sub>2</sub>N<sub>2</sub>}<sub>2</sub>] (**3**) acquired in CDCl<sub>3</sub>.

**Fig. S12** <sup>119</sup>Sn{<sup>1</sup>H} NMR spectrum of [<sup>n</sup>Bu<sub>2</sub>Sn{SeC<sub>4</sub>H(Me-4,6)<sub>2</sub>N<sub>2</sub>}<sub>2</sub>] (**3**) acquired in CDCl<sub>3</sub>.

**Fig. S13** <sup>1</sup>H NMR spectrum of [<sup>n</sup>Bu<sub>2</sub>Sn{SeC<sub>4</sub>H(Me-4,6)<sub>2</sub>N<sub>2</sub>}Cl] (**6**) acquired in CDCl<sub>3</sub>.

**Fig. S14** <sup>13</sup>C{<sup>1</sup>H} NMR spectrum of [<sup>n</sup>Bu<sub>2</sub>Sn{SeC<sub>4</sub>H(Me-4,6)<sub>2</sub>N<sub>2</sub>}Cl] (**6**) acquired in CDCl<sub>3</sub>.

**Fig. S15** <sup>77</sup>Se{<sup>1</sup>H} NMR spectrum of [<sup>n</sup>Bu<sub>2</sub>Sn{SeC<sub>4</sub>H(Me-4,6)<sub>2</sub>N<sub>2</sub>}Cl] (**6**) acquired in CDCl<sub>3</sub>.

**Fig. S16** <sup>119</sup>Sn{<sup>1</sup>H} NMR spectrum of [<sup>n</sup>Bu<sub>2</sub>Sn{SeC<sub>4</sub>H(Me-4,6)<sub>2</sub>N<sub>2</sub>}Cl] (**6**) acquired in CDCl<sub>3</sub>.

**Fig. S17** Variable temperature <sup>119</sup>Sn{<sup>1</sup>H} NMR spectrum of [<sup>n</sup>Bu<sub>2</sub>Sn{SeC<sub>4</sub>H(Me-4,6)<sub>2</sub>N<sub>2</sub>}Cl] (**6**) acquired in CDCl<sub>3</sub>.

**Fig. S18** ORTEP Diagram of [<sup>n</sup>Bu<sub>2</sub>Sn{SeC<sub>4</sub>H(Me-4,6)<sub>2</sub>N<sub>2</sub>}<sub>2</sub>] at 10% probability.

**Fig. S19** TG curve of [Me<sub>2</sub>Sn{SeC<sub>4</sub>H(Me-4,6)<sub>2</sub>N<sub>2</sub>}<sub>2</sub>] (**1**).

**Fig. S20** TG curve of [Et<sub>2</sub>Sn{SeC<sub>4</sub>H(Me-4,6)<sub>2</sub>N<sub>2</sub>}<sub>2</sub>] (**2**).

**Fig. S21** TG curve of [<sup>n</sup>Bu<sub>2</sub>Sn{SeC<sub>4</sub>H(Me-4,6)<sub>2</sub>N<sub>2</sub>}<sub>2</sub>] (**3**).

**Fig. S22** TG curve of [<sup>i</sup>Bu<sub>2</sub>Sn{SeC<sub>4</sub>H(Me-4,6)<sub>2</sub>N<sub>2</sub>}<sub>2</sub>] (**4**).

**Fig. S23** TG curve of [<sup>i</sup>Bu<sub>2</sub>Sn{SeC<sub>4</sub>H(Me-4,6)<sub>2</sub>N<sub>2</sub>}Cl] (**7**).

**Fig. S24** a) Simulated XRD pattern of hexagonal SnSe<sub>2</sub> (JCPDS-40-1465). XRD profiles of SnSe<sub>2</sub> nanosheets obtained by b) thermolysis of [Et<sub>2</sub>Sn{SeC<sub>4</sub>H(Me-4,6)<sub>2</sub>N<sub>2</sub>}<sub>2</sub>] (**2**), c) [<sup>n</sup>Bu<sub>2</sub>Sn{SeC<sub>4</sub>H(Me-4,6)<sub>2</sub>N<sub>2</sub>}<sub>2</sub>] (**3**) and d) [<sup>t</sup>Bu<sub>2</sub>Sn{SeC<sub>4</sub>H(Me-4,6)<sub>2</sub>N<sub>2</sub>}<sub>2</sub>] (**4**) in OLA at 210 °C for 5 minutes (\* indicates the impurity peak of Se).

**Fig. S25** a) Simulated XRD pattern of hexagonal SnSe<sub>2</sub> (JCPDS-23-0602). XRD profiles of SnSe<sub>2</sub> nanosheets obtained by b) thermolysis of [Et<sub>2</sub>Sn{SeC<sub>4</sub>H(Me-4,6)<sub>2</sub>N<sub>2</sub>}<sub>2</sub>] (**2**), c) [<sup>n</sup>Bu<sub>2</sub>Sn{SeC<sub>4</sub>H(Me-4,6)<sub>2</sub>N<sub>2</sub>}<sub>2</sub>] (**3**) and d) [<sup>t</sup>Bu<sub>2</sub>Sn{SeC<sub>4</sub>H(Me-4,6)<sub>2</sub>N<sub>2</sub>}<sub>2</sub>] (**4**) in OLA at 210 °C for 10 minutes.

**Fig. S26.** SEM images of SnSe<sub>2</sub> nanosheets obtained by a) thermolysis of [Et<sub>2</sub>Sn{SeC<sub>4</sub>H(Me-4,6)<sub>2</sub>N<sub>2</sub>}<sub>2</sub>] (**2**), b) [<sup>t</sup>Bu<sub>2</sub>Sn{SeC<sub>4</sub>H(Me-4,6)<sub>2</sub>N<sub>2</sub>}<sub>2</sub>] (**4**) in OLA at 210 °C for 10 minutes (Inset show magnified images of the same).

**Fig. S27** XRD profile of SnSe<sub>2</sub> thin film obtained by AACVD of [<sup>t</sup>Bu<sub>2</sub>Sn{SeC<sub>4</sub>H(Me-4,6)<sub>2</sub>N<sub>2</sub>}<sub>2</sub>] (**4**) on silicon substrate at 375 °C for 1 h overlaid on simulated XRD pattern of hexagonal SnSe<sub>2</sub> (JCPDS-40-1465).

**Fig. S28** Plots of [F(R)hv]<sup>2</sup> vs energy generated by Kubelka-Munk transformation of solid-state diffuse reflectance data of SnSe<sub>2</sub> nano-sheets obtained by thermolysis of [Et<sub>2</sub>Sn{SeC<sub>4</sub>H(Me-4,6)<sub>2</sub>N<sub>2</sub>}<sub>2</sub>] (**2**) in OLA at 210 °C for a) 2, b) 5 and c) 10 minutes, respectively for determining direct band gap energies.

**Fig. S29** Plots of [F(R)hv]<sup>1/2</sup> vs energy generated by Kubelka-Munk transformation of solid-state diffuse reflectance data of SnSe<sub>2</sub> nano-sheets obtained by thermolysis of [Et<sub>2</sub>Sn{SeC<sub>4</sub>H(Me-4,6)<sub>2</sub>N<sub>2</sub>}<sub>2</sub>] (**2**) in OLA at 210 °C for a) 2, b) 5 and c) 10 minutes, respectively for determining indirect band gap energies.

**Fig. S30** Plots of [F(R)hv]<sup>1/2</sup> vs energy generated by Kubelka-Munk transformation of solid-state diffuse reflectance data of SnSe<sub>2</sub> nano-sheets obtained by thermolysis of [<sup>t</sup>Bu<sub>2</sub>Sn{SeC<sub>4</sub>H(Me-4,6)<sub>2</sub>N<sub>2</sub>}<sub>2</sub>] (**4**) in OLA at 210 °C for a) 2, b) 5 and c) 10 minutes, respectively for determining indirect band gap energies.

**Fig. S31** Plots of [F(R)hv]<sup>1/2</sup> vs energy generated by Kubelka-Munk transformation of solid-state diffuse reflectance data of a) as-deposited SnSe<sub>2</sub> thin films obtained by AACVD of [<sup>t</sup>Bu<sub>2</sub>Sn{SeC<sub>4</sub>H(Me-4,6)<sub>2</sub>N<sub>2</sub>}<sub>2</sub>] (**4**) on silicon substrate at 375 °C for 1 h and b) annealed thin films to determine indirect band gap energies.

**Table S1** Crystallographic and structural determination data for [<sup>n</sup>Bu<sub>2</sub>Sn{SeC<sub>4</sub>H(Me-4,6)<sub>2</sub>N<sub>2</sub>}<sub>2</sub>] (**3**).

**Table S2** Selected bond lengths (Å) and angles (°) for [<sup>n</sup>Bu<sub>2</sub>Sn{SeC<sub>4</sub>H(Me-4,6)<sub>2</sub>N<sub>2</sub>}<sub>2</sub>] (**3**).

**Table S3** XRD data for tin selenide nanosheets.

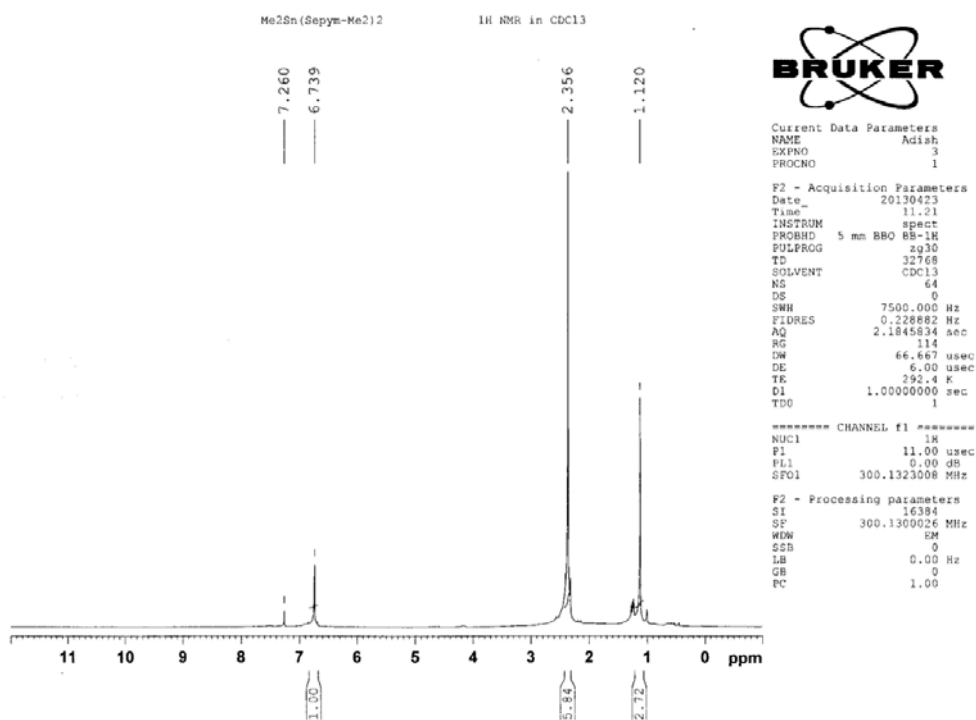

Fig. S1 <sup>1</sup>H NMR spectrum of [Me<sub>2</sub>Sn{SeC<sub>4</sub>H(Me-4,6)<sub>2</sub>N<sub>2</sub>}<sub>2</sub>] (**1**) acquired in CDCl<sub>3</sub>.

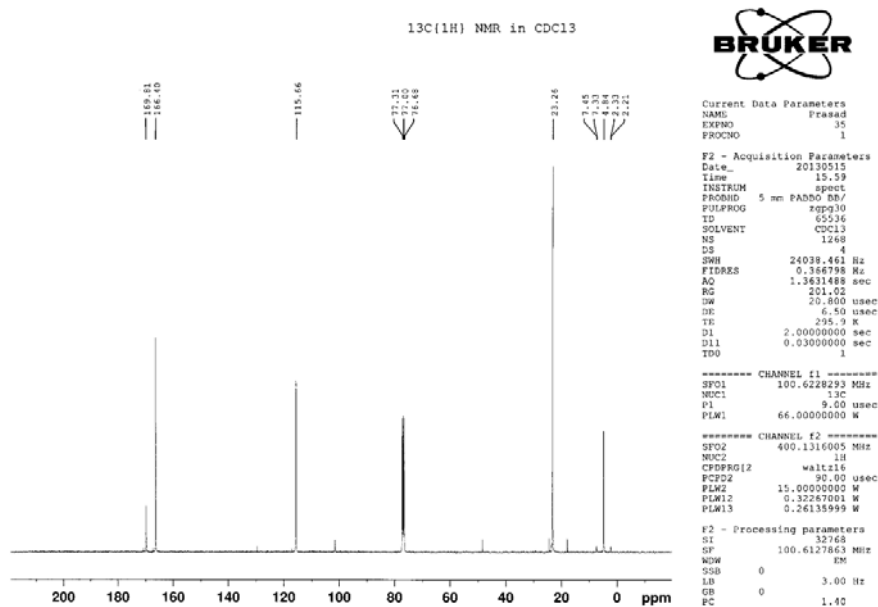

Fig. S2 <sup>13</sup>C{<sup>1</sup>H} NMR spectrum of (**1**) acquired in CDCl<sub>3</sub>.

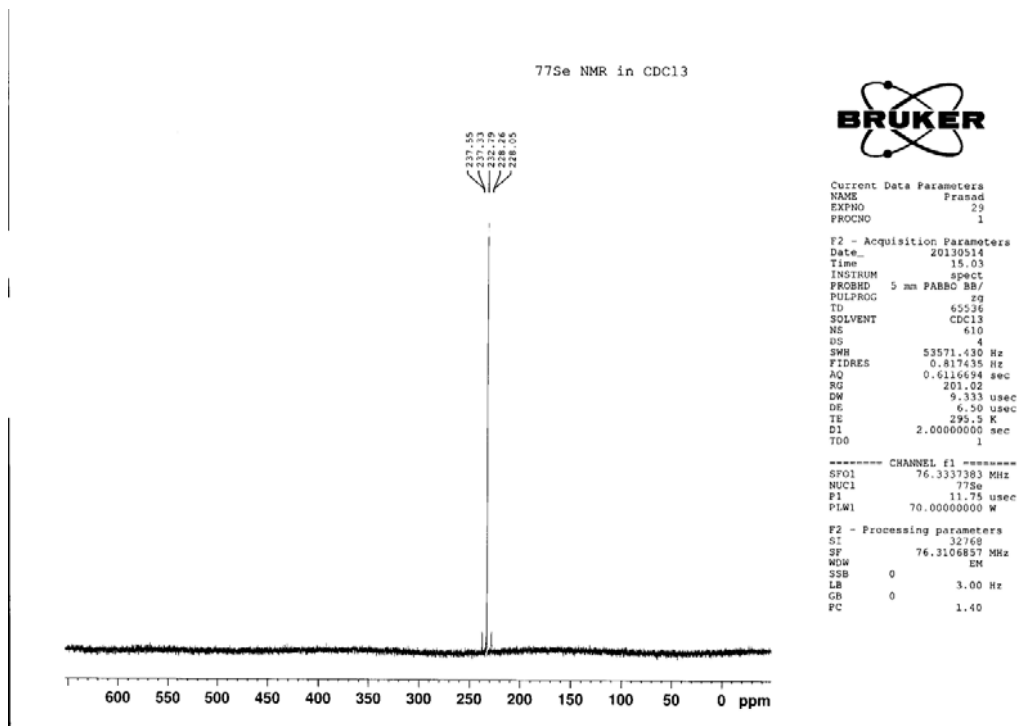

Fig. S3  $^{77}\text{Se}\{^1\text{H}\}$  NMR spectrum of  $[\text{Me}_2\text{Sn}\{\text{SeC}_4\text{H}(\text{Me-4,6})_2\text{N}_2\}_2]$  (1) acquired in  $\text{CDCl}_3$ .

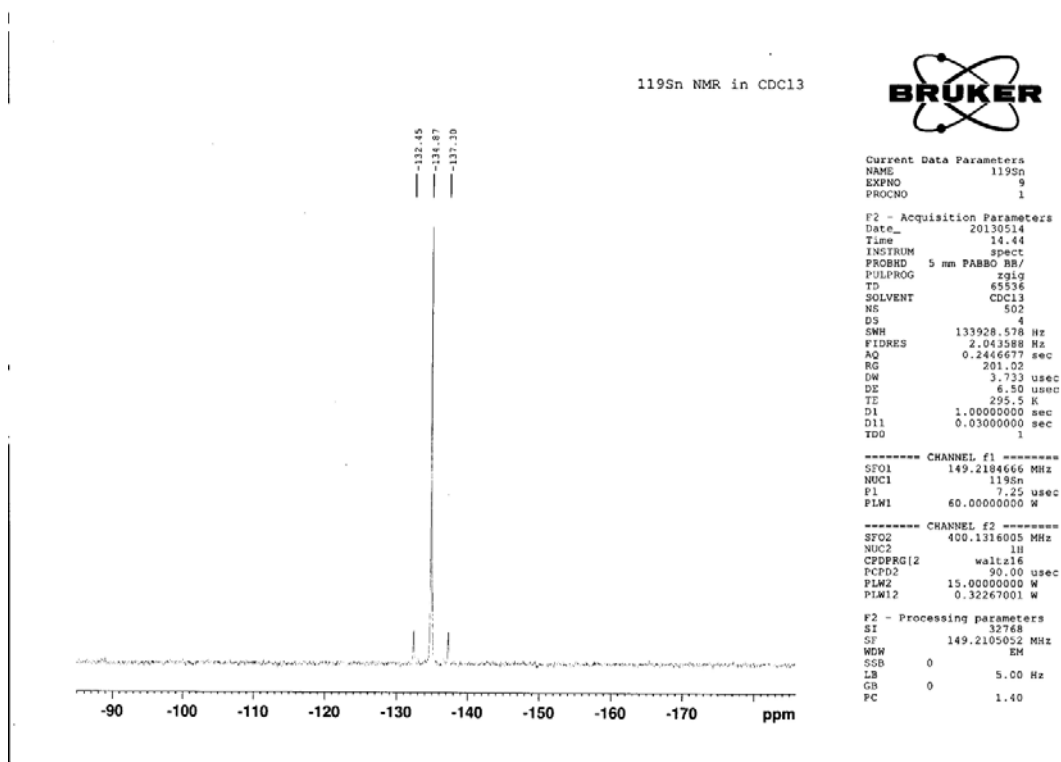

Fig. S4  $^{119}\text{Sn}\{^1\text{H}\}$  NMR spectrum of  $[\text{Me}_2\text{Sn}\{\text{SeC}_4\text{H}(\text{Me-4,6})_2\text{N}_2\}_2]$  (1) acquired in  $\text{CDCl}_3$ .

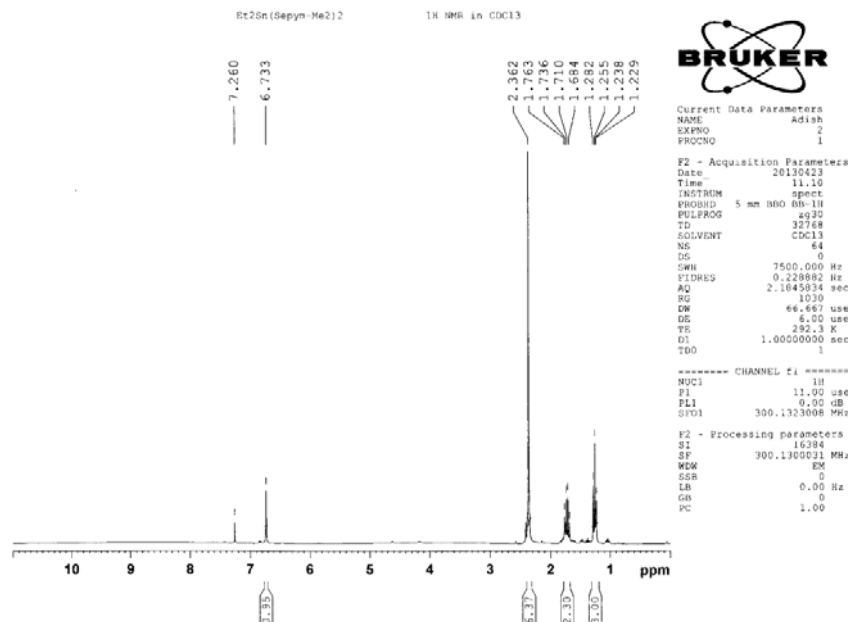

Fig. S5  $^1\text{H}$  NMR spectrum of  $[\text{Et}_2\text{Sn}\{\text{SeC}_4\text{H}(\text{Me-4,6})_2\text{N}_2\}_2]$  (**2**) acquired in  $\text{CDCl}_3$ .

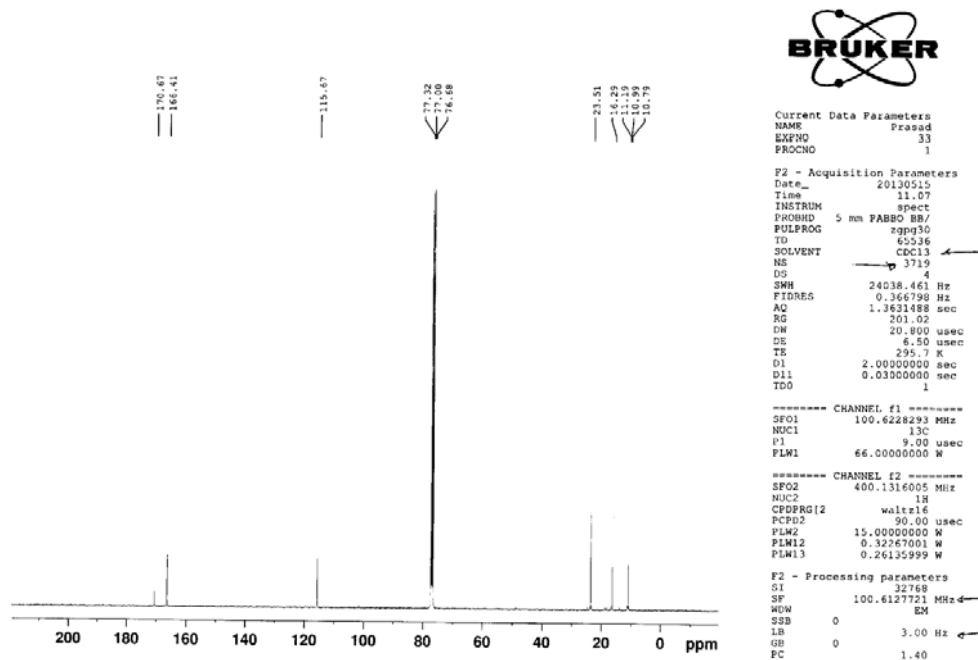

Fig. S6  $^{13}\text{C}\{^1\text{H}\}$  NMR spectrum of  $[\text{Et}_2\text{Sn}\{\text{SeC}_4\text{H}(\text{Me-4,6})_2\text{N}_2\}_2]$  (**2**) acquired in  $\text{CDCl}_3$ .

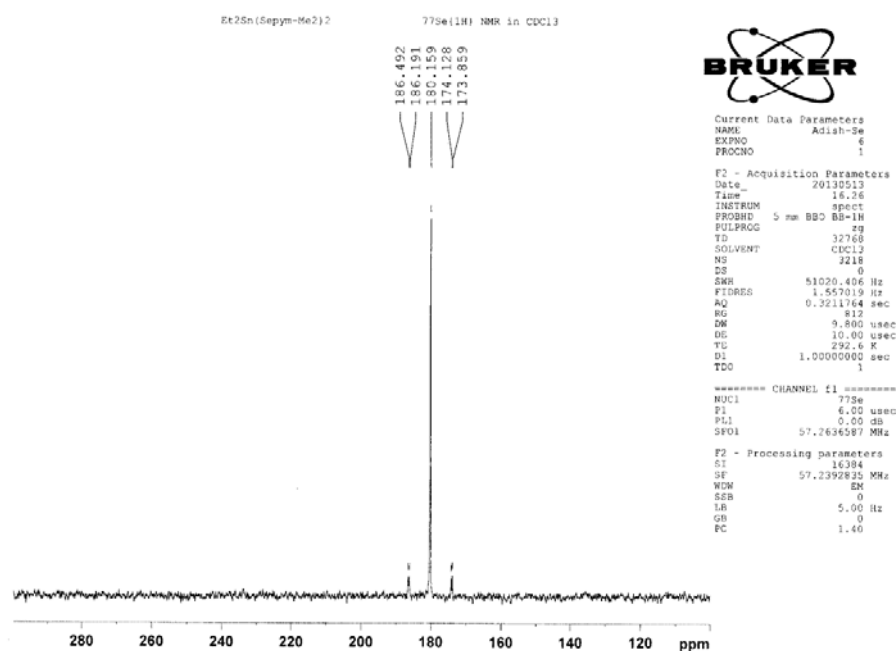

Fig. S7  $^{77}\text{Se}\{^1\text{H}\}$  NMR spectrum of  $[\text{Et}_2\text{Sn}\{\text{SeC}_4\text{H}(\text{Me-4,6})_2\text{N}_2\}_2]$  (**2**) acquired in  $\text{CDCl}_3$ .

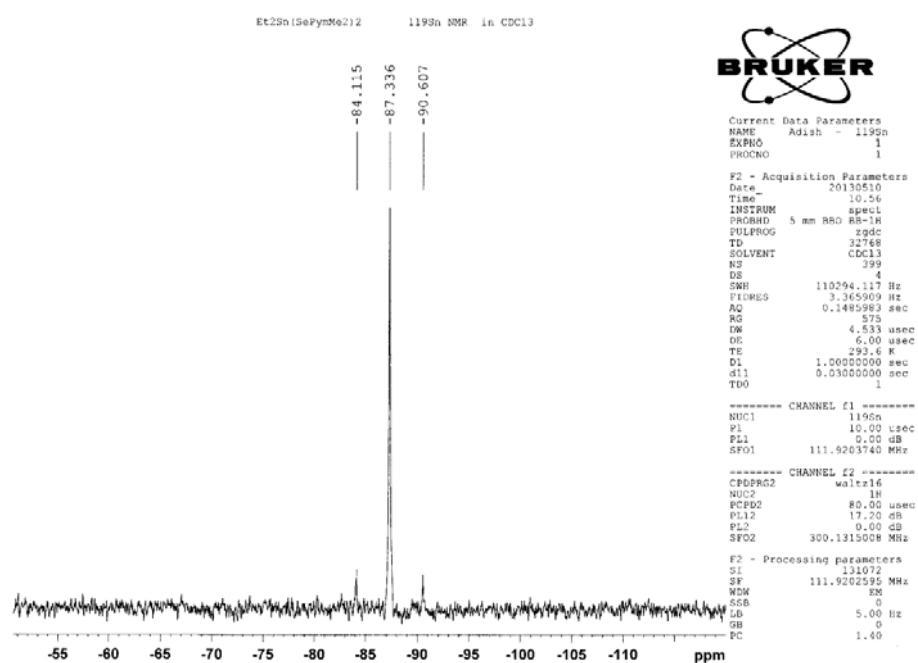

Fig. S8  $^{119}\text{Sn}\{^1\text{H}\}$  NMR spectrum of  $[\text{Et}_2\text{Sn}\{\text{SeC}_4\text{H}(\text{Me-4,6})_2\text{N}_2\}_2]$  (**2**) acquired in  $\text{CDCl}_3$ .

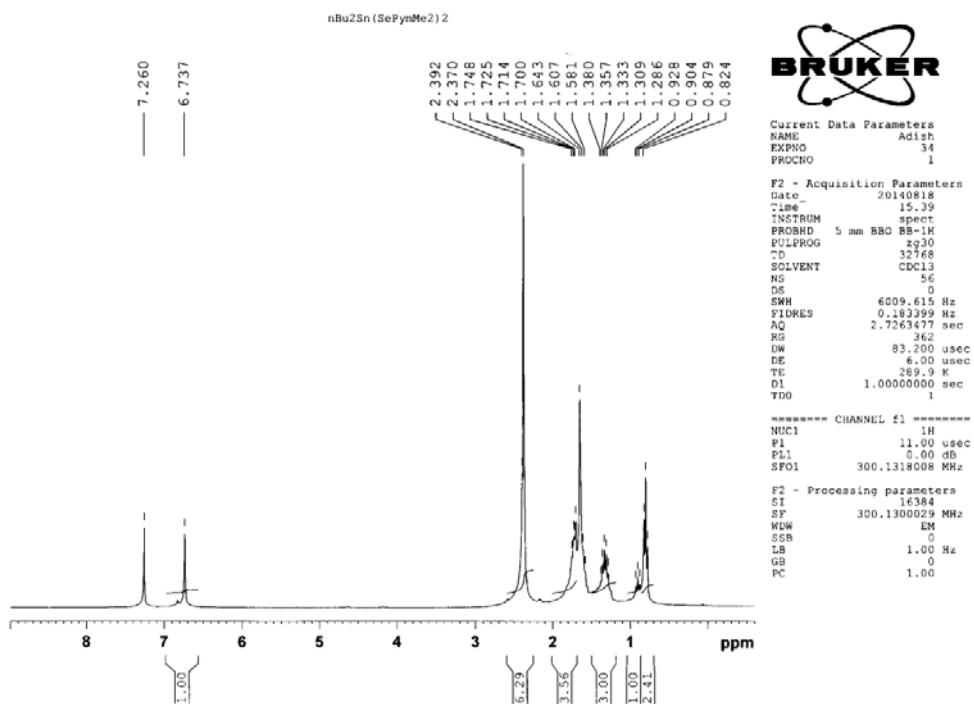

Fig. S9  $^1\text{H}$  NMR spectrum of  $[\text{nBu}_2\text{Sn}\{\text{SeC}_4\text{H}(\text{Me-4,6})_2\text{N}_2\}_2]$  (**3**) acquired in  $\text{CDCl}_3$ .

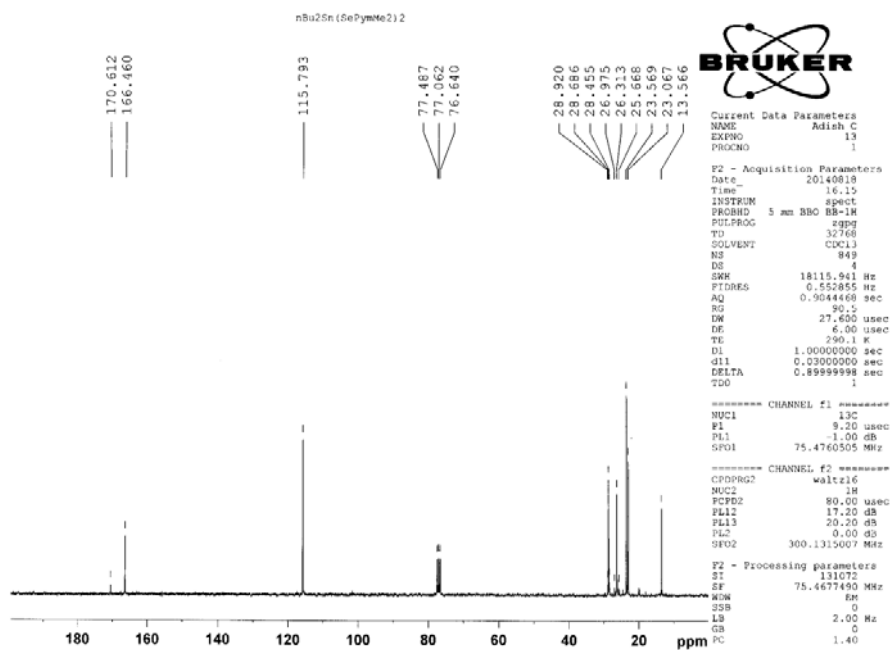

Fig. S10  $^{13}\text{C}\{^1\text{H}\}$  NMR spectrum of  $[\text{nBu}_2\text{Sn}\{\text{SeC}_4\text{H}(\text{Me-4,6})_2\text{N}_2\}_2]$  (**3**) acquired in  $\text{CDCl}_3$ .

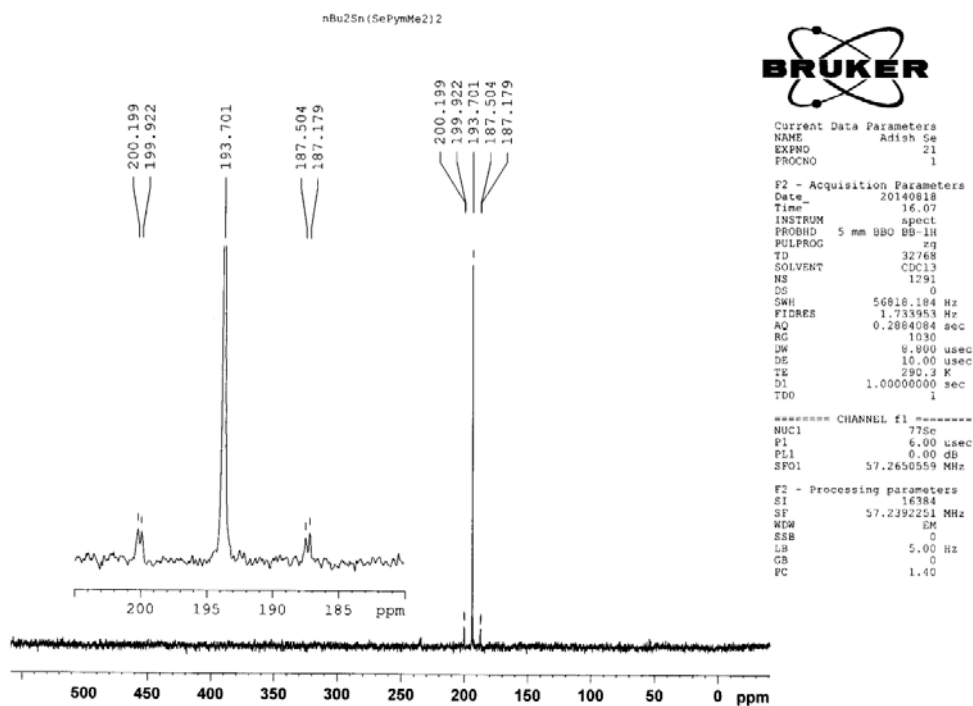

**Fig. S11**  $^{77}\text{Se}\{^1\text{H}\}$  NMR spectrum of  $[\text{nBu}_2\text{Sn}\{\text{SeC}_4\text{H}(\text{Me-4,6})_2\text{N}_2\}_2]$  (**3**) acquired in  $\text{CDCl}_3$ .

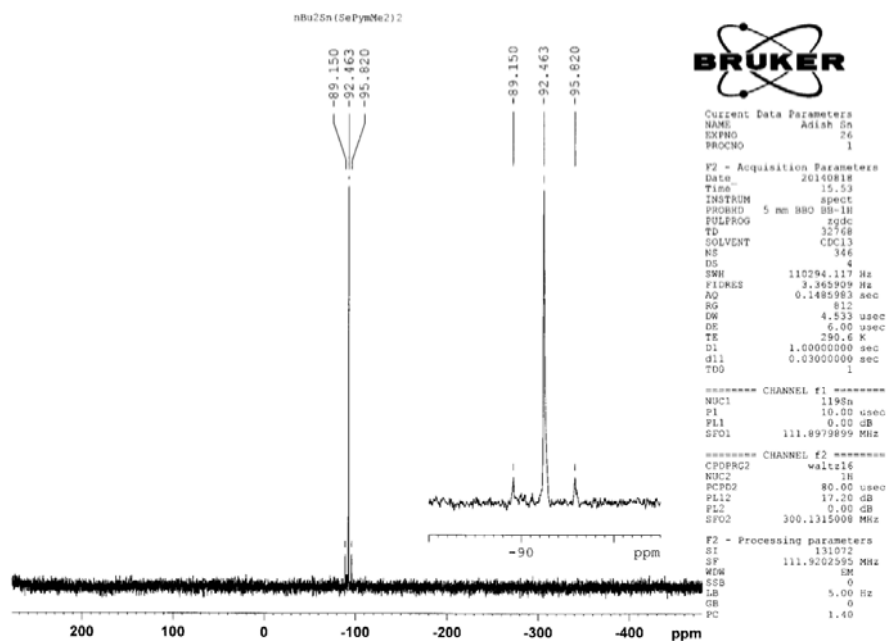

**Fig. S12**  $^{119}\text{Sn}\{^1\text{H}\}$  NMR spectrum of  $[\text{nBu}_2\text{Sn}\{\text{SeC}_4\text{H}(\text{Me-4,6})_2\text{N}_2\}_2]$  (**3**) acquired in  $\text{CDCl}_3$ .



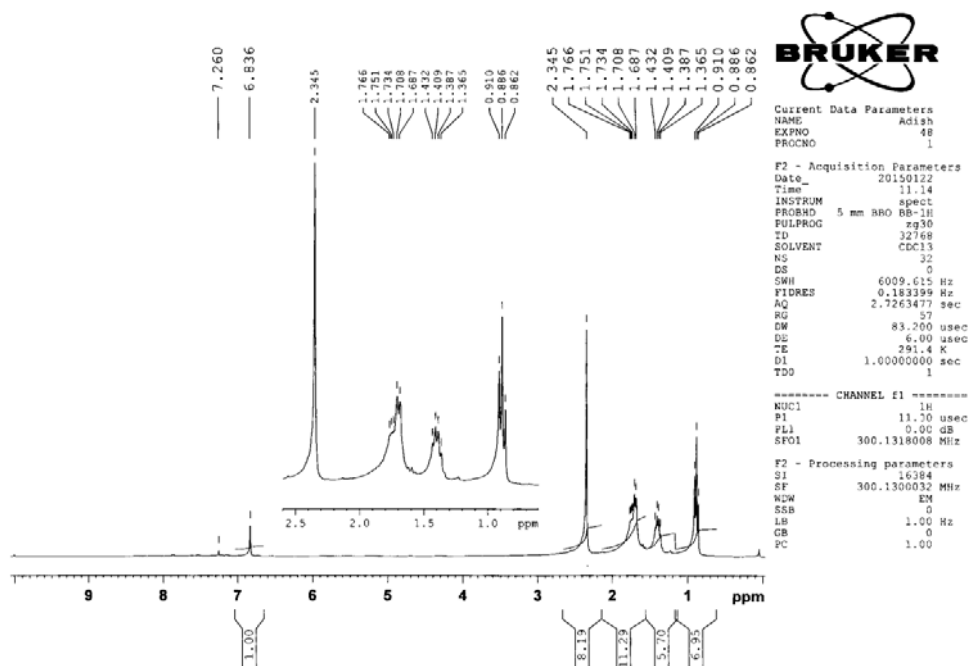

Fig. S13  $^1\text{H}$  NMR spectrum of  $[\text{nBu}_2\text{Sn}\{\text{SeC}_4\text{H}(\text{Me-4,6})_2\text{N}_2\}\text{Cl}]$  (**6**) acquired in  $\text{CDCl}_3$ .

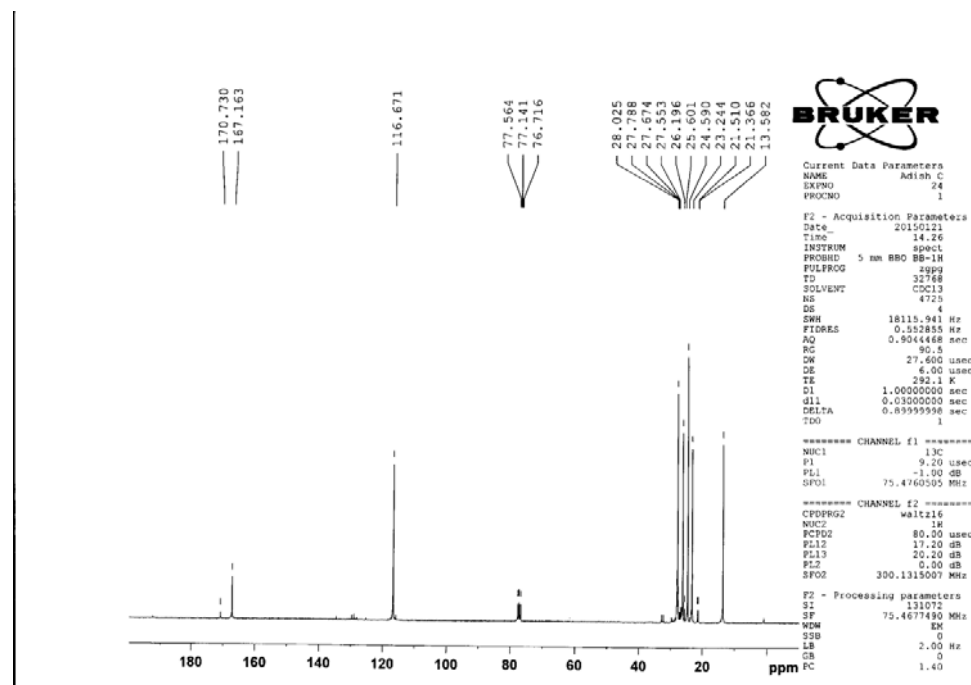

Fig. S14  $^{13}\text{C}\{^1\text{H}\}$  NMR spectrum of  $[\text{nBu}_2\text{Sn}\{\text{SeC}_4\text{H}(\text{Me-4,6})_2\text{N}_2\}\text{Cl}]$  (**6**) in  $\text{CDCl}_3$

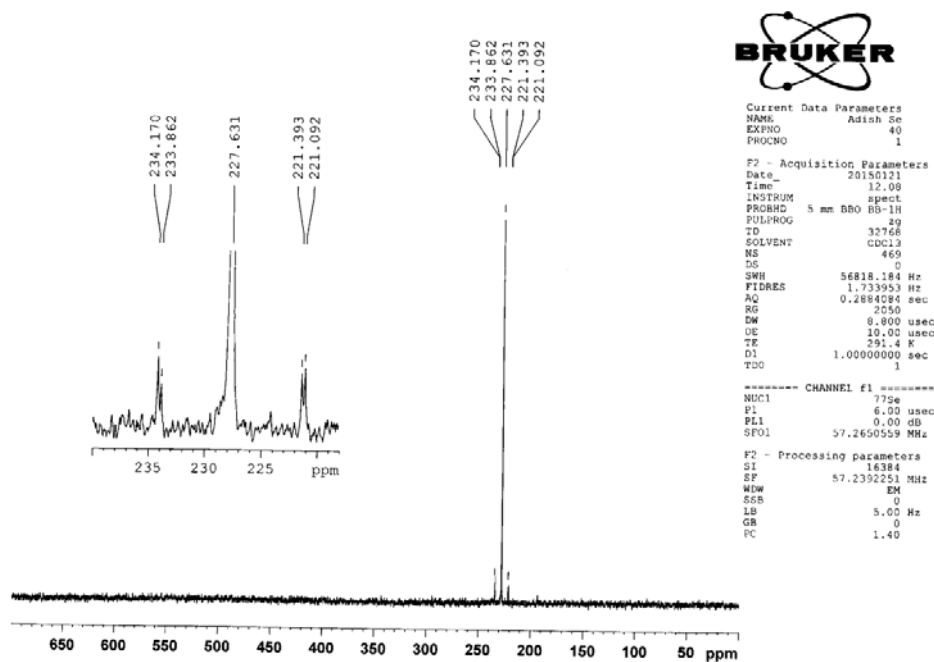

Fig. S15  $^{77}\text{Se}\{^1\text{H}\}$  NMR spectrum of  $[\text{nBu}_2\text{Sn}\{\text{SeC}_4\text{H}(\text{Me-4,6})_2\text{N}_2\}\text{Cl}]$  (**6**) acquired in  $\text{CDCl}_3$ .

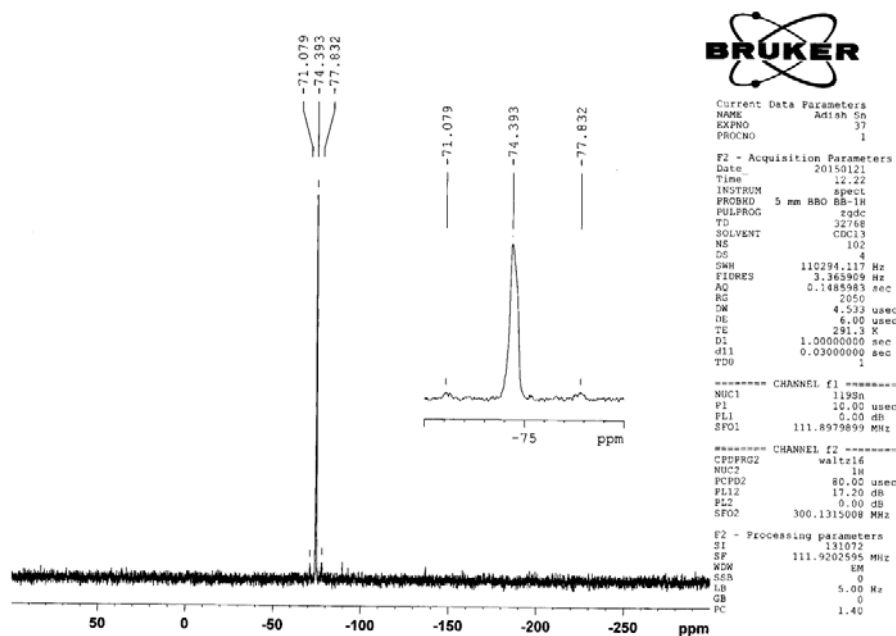

Fig. S16  $^{119}\text{Sn}\{^1\text{H}\}$  NMR spectrum of  $[\text{nBu}_2\text{Sn}\{\text{SeC}_4\text{H}(\text{Me-4,6})_2\text{N}_2\}\text{Cl}]$  (**6**) acquired in  $\text{CDCl}_3$ .

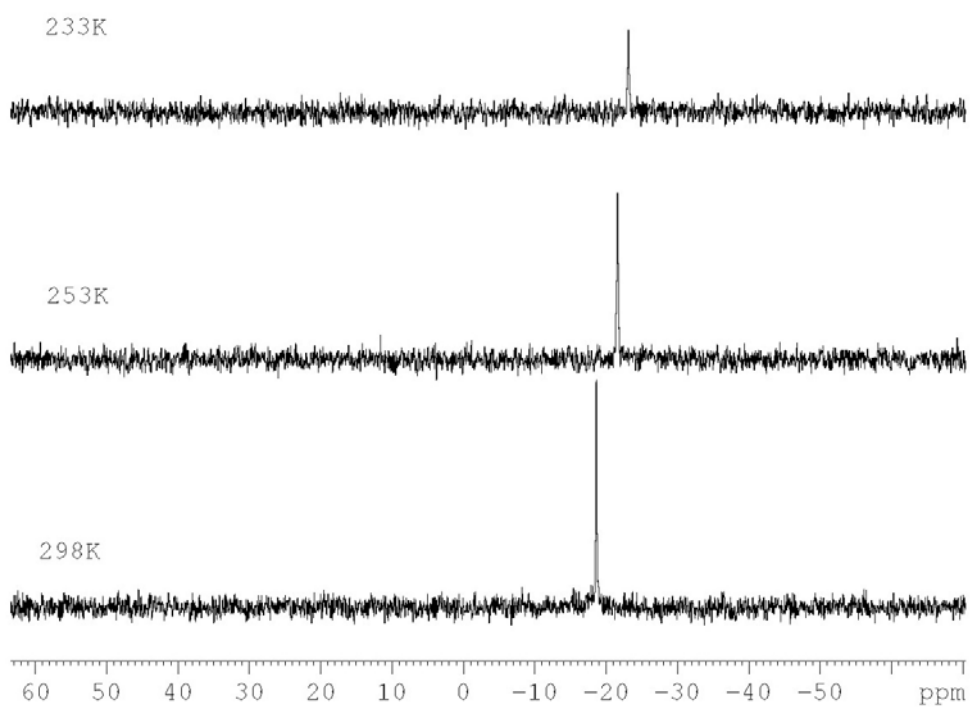

**Fig. S17** Variable temperature  $^{119}\text{Sn}\{^1\text{H}\}$  NMR spectrum of  $[\text{nBu}_2\text{Sn}\{\text{SeC}_4\text{H}(\text{Me-4,6})_2\text{N}_2\}\text{Cl}]$  (**6**) acquired in  $\text{CDCl}_3$ .

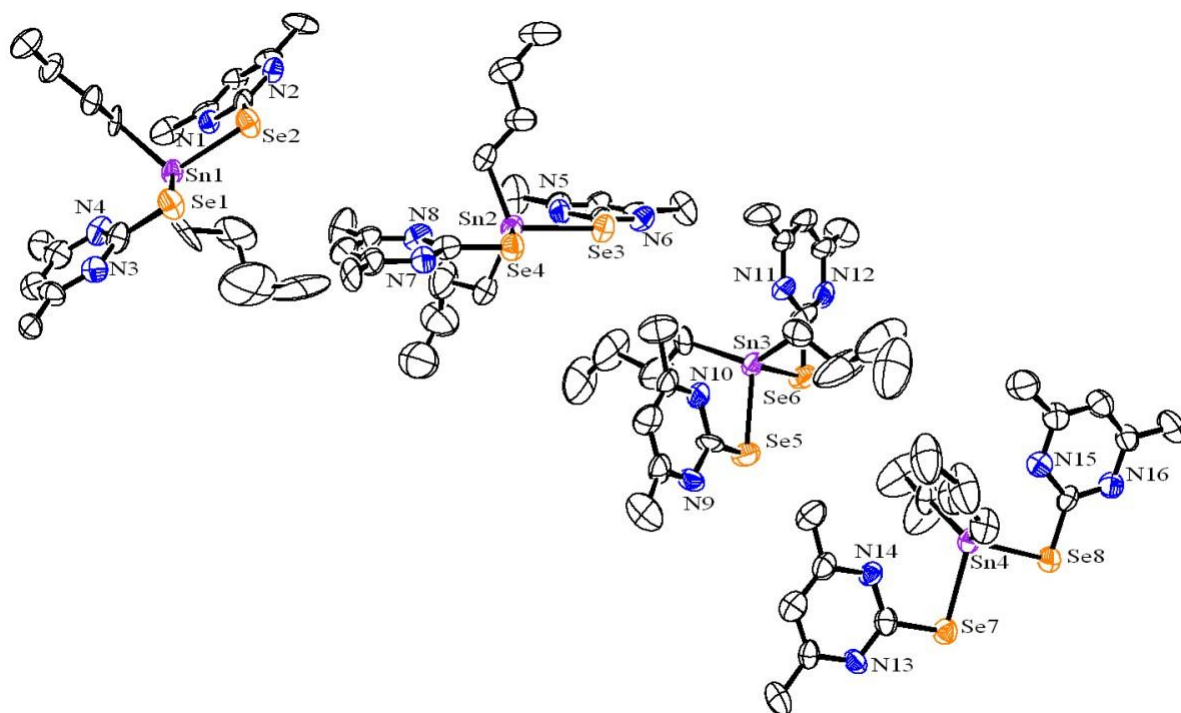

**Fig. S18** ORTEP Diagram of  $[t\text{Bu}_2\text{Sn}\{\text{SeC}_4\text{H}(\text{Me-4,6})_2\text{N}_2\}_2]$  at 10% probability

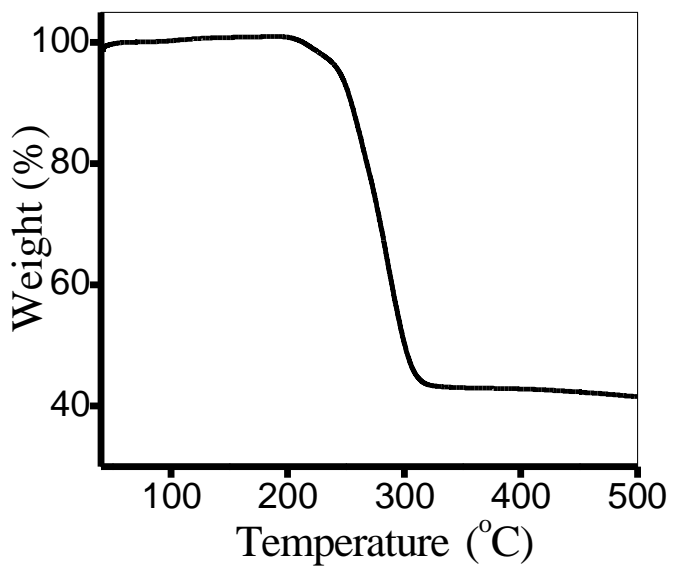

**Fig. S19** TG curve of  $[\text{Me}_2\text{Sn}\{\text{SeC}_4\text{H}(\text{Me-4,6})_2\text{N}_2\}_2]$  (**1**).

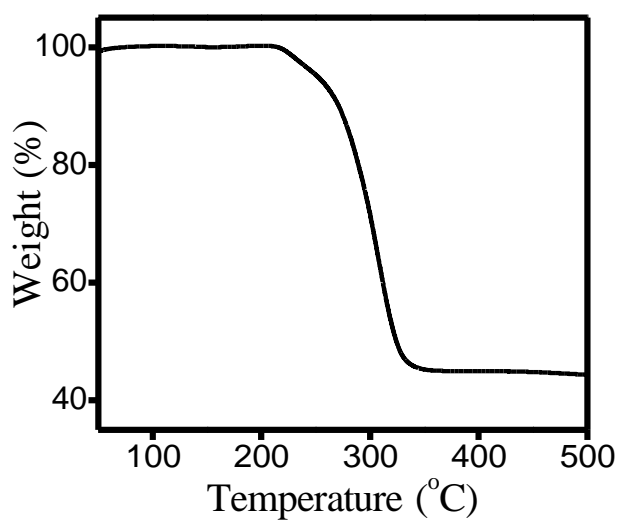

**Fig. S20** TG curve of  $[\text{Et}_2\text{Sn}\{\text{SeC}_4\text{H}(\text{Me-4,6})_2\text{N}_2\}_2]$  (2).

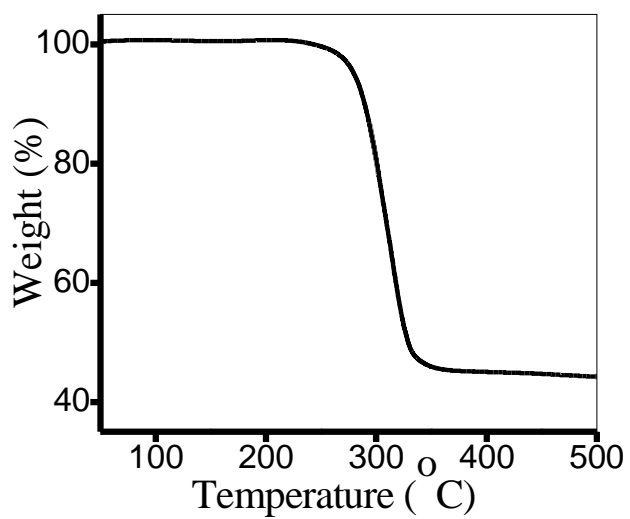

**Fig. S21** TG curve of  $[\text{nBu}_2\text{Sn}\{\text{SeC}_4\text{H}(\text{Me-4,6})_2\text{N}_2\}_2]$  (3).

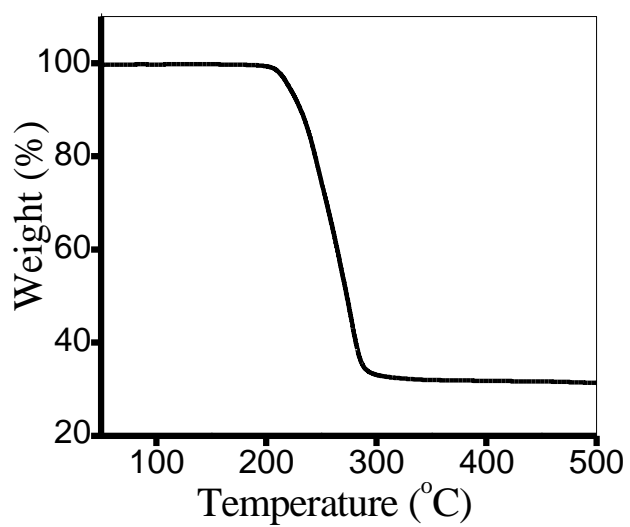

**Fig. S22** TG curve of [ $t\text{Bu}_2\text{Sn}\{\text{SeC}_4\text{H}(\text{Me-4,6})_2\text{N}_2\}_2$ ] (4).

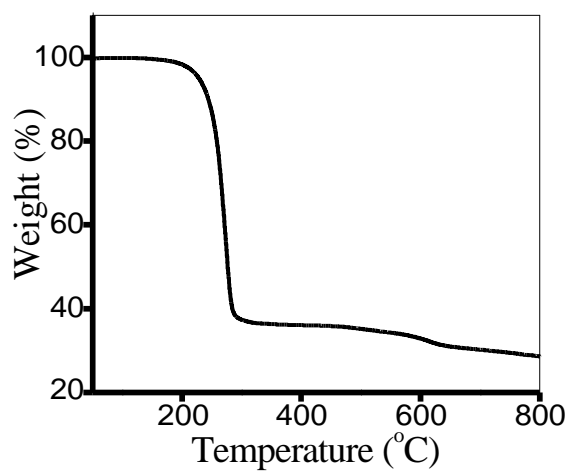

**Fig. S23** TG curve of [ $t\text{Bu}_2\text{Sn}\{\text{SeC}_4\text{H}(\text{Me-4,6})_2\text{N}_2\}\text{Cl}$ ] (7).

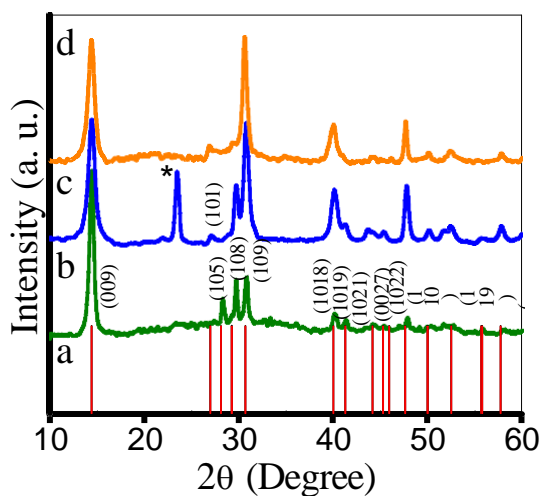

**Fig. S24** a) Simulated XRD pattern of hexagonal SnSe<sub>2</sub> (JCPDS-40-1465). XRD profiles of SnSe<sub>2</sub> nanosheets obtained by b) thermolysis of [Et<sub>2</sub>Sn{SeC<sub>4</sub>H(Me-4,6)<sub>2</sub>N<sub>2</sub>}<sub>2</sub>] (**2**), c) [<sup>n</sup>Bu<sub>2</sub>Sn{SeC<sub>4</sub>H(Me-4,6)<sub>2</sub>N<sub>2</sub>}<sub>2</sub>] (**3**) and d) [<sup>t</sup>Bu<sub>2</sub>Sn{SeC<sub>4</sub>H(Me-4,6)<sub>2</sub>N<sub>2</sub>}<sub>2</sub>] (**4**) in OLA at 210 °C for 5 minutes (\* indicates the impurity peak of Se).

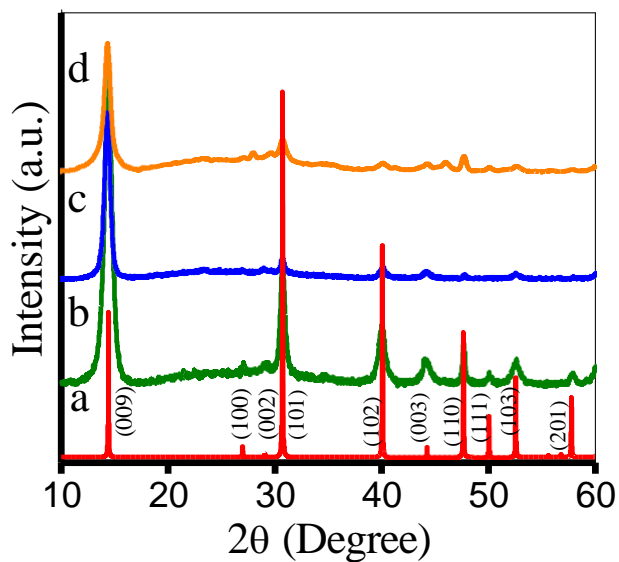

**Fig. S25** a) Simulated XRD pattern of hexagonal SnSe<sub>2</sub> (JCPDS-23-0602). XRD profiles of SnSe<sub>2</sub> nanosheets obtained by b) thermolysis of [Et<sub>2</sub>Sn{SeC<sub>4</sub>H(Me-4,6)<sub>2</sub>N<sub>2</sub>}<sub>2</sub>] (**2**), c) [<sup>n</sup>Bu<sub>2</sub>Sn{SeC<sub>4</sub>H(Me-4,6)<sub>2</sub>N<sub>2</sub>}<sub>2</sub>] (**3**) and d) [<sup>t</sup>Bu<sub>2</sub>Sn{SeC<sub>4</sub>H(Me-4,6)<sub>2</sub>N<sub>2</sub>}<sub>2</sub>] (**4**) in OLA at 210 °C for 10 minutes.

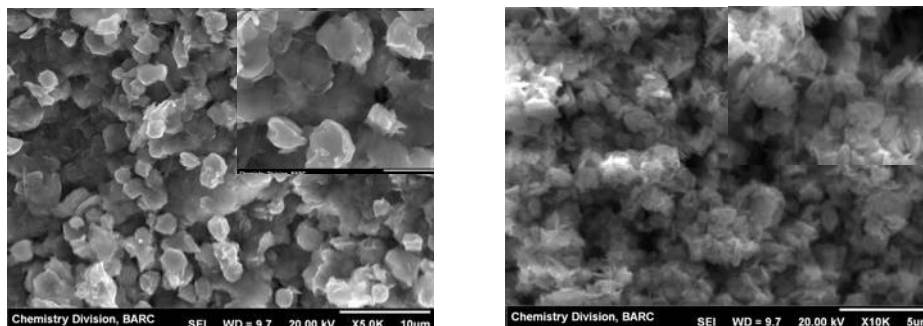

**Fig. S26.** SEM images of SnSe<sub>2</sub> nanosheets obtained by a) thermolysis of [Et<sub>2</sub>Sn{SeC<sub>4</sub>H(Me-4,6)<sub>2</sub>N<sub>2</sub>}<sub>2</sub>] (**2**), b) [tBu<sub>2</sub>Sn{SeC<sub>4</sub>H(Me-4,6)<sub>2</sub>N<sub>2</sub>}<sub>2</sub>] (**4**) in OLA at 210 °C for 10 minutes (Inset show magnified images of the same).

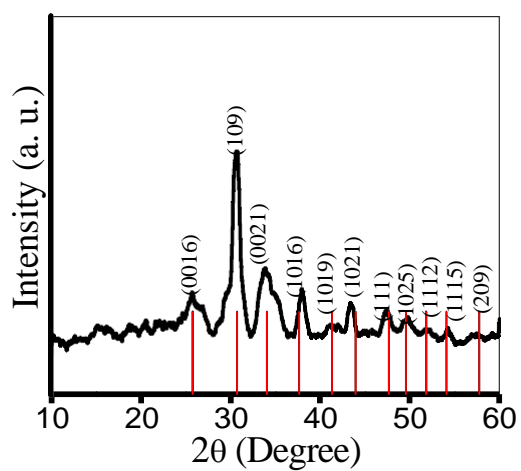

**Fig. S27** XRD profile of SnSe<sub>2</sub> thin film obtained by AACVD of [tBu<sub>2</sub>Sn{SeC<sub>4</sub>H(Me-4,6)<sub>2</sub>N<sub>2</sub>}<sub>2</sub>] (**4**) on silicon substrate at 375 °C for 1 h overlaid on simulated XRD pattern of hexagonal SnSe<sub>2</sub> (JCPDS-40-1465).



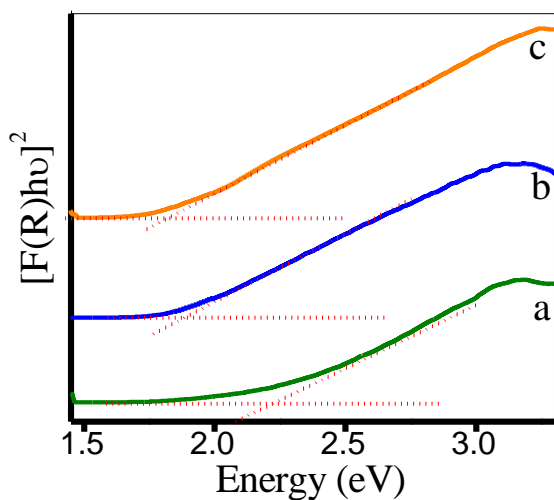

**Fig. S28** Plots of  $[F(R)hv]^2$  vs energy generated by Kubelka-Munk transformation of solid-state diffuse reflectance data of SnSe<sub>2</sub> nano-sheets obtained by thermolysis of  $[Et_2Sn\{SeC_4H(Me-4,6)_2N_2\}_2]$  (**2**) in OLA at 210 °C for a) 2, b) 5 and c) 10 minutes, respectively for determining direct band gap energies.

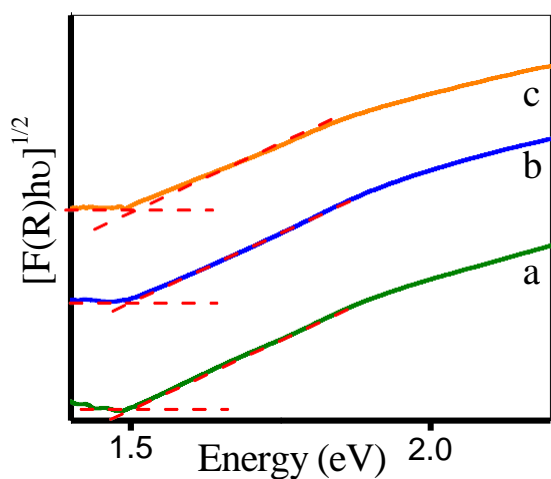

**Fig. S29** Plots of  $[F(R)hv]^{1/2}$  vs energy generated by Kubelka-Munk transformation of solid-state diffuse reflectance data of SnSe<sub>2</sub> nano-sheets obtained by thermolysis of  $[Et_2Sn\{SeC_4H(Me-4,6)_2N_2\}_2]$  (**2**) in OLA at 210 °C for a) 2, b) 5 and c) 10 minutes, respectively for determining indirect band gap energies.

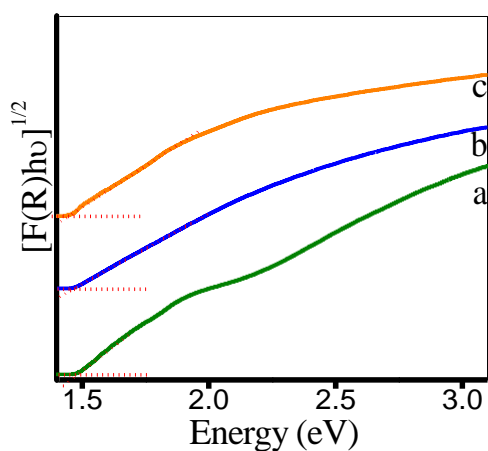

**Fig. S30** Plots of  $[F(R)hv]^{1/2}$  vs energy generated by Kubelka-Munk transformation of solid-state diffuse reflectance data of SnSe<sub>2</sub> nano-sheets obtained by thermolysis of  $[{}^t\text{Bu}_2\text{Sn}\{\text{SeC}_4\text{H}(\text{Me-4,6})_2\text{N}_2\}_2]$  (**4**) in OLA at 210 °C for a) 2, b) 5 and c) 10 minutes, respectively for determining indirect band gap energies.

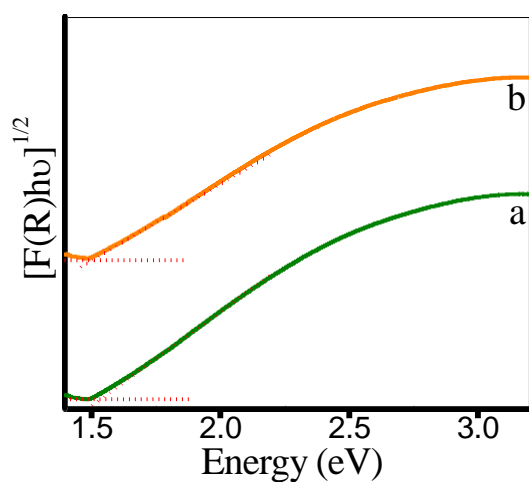

**Fig. S31** Plots of  $[F(R)hv]^{1/2}$  vs energy generated by Kubelka-Munk transformation of solid-state diffuse reflectance data of a) as-deposited SnSe<sub>2</sub> thin films obtained by AACVD of  $[{}^t\text{Bu}_2\text{Sn}\{\text{SeC}_4\text{H}(\text{Me-4,6})_2\text{N}_2\}_2]$  (**4**) on silicon substrate at 375 °C for 1 h and b) annealed thin films to determine indirect band gap energies.

**Table S1.** Crystallographic and structural determination data for [<sup>n</sup>Bu<sub>2</sub>Sn{SeC<sub>4</sub>H(Me-4,6)<sub>2</sub>N<sub>2</sub>}<sub>2</sub>] (3).

|                                                             | [ <sup>n</sup> Bu <sub>2</sub> Sn{SeC <sub>4</sub> H(Me-4,6) <sub>2</sub> N <sub>2</sub> } <sub>2</sub> ] (3) |
|-------------------------------------------------------------|---------------------------------------------------------------------------------------------------------------|
| Chemical formula                                            | C <sub>20</sub> H <sub>32</sub> N <sub>4</sub> Se <sub>2</sub> Sn                                             |
| Formula weight                                              | 605.11                                                                                                        |
| Crystal size/mm <sup>3</sup>                                | 0.20 × 0.15 × 0.05                                                                                            |
| Crystal system / space group                                | Triclinic /P1 <sup>-</sup>                                                                                    |
| Unit cell dimensions                                        |                                                                                                               |
| a/Å                                                         | 11.659(6)                                                                                                     |
| b/Å                                                         | 16.166(17)                                                                                                    |
| c/Å                                                         | 29.13(3)                                                                                                      |
| α                                                           | 84.62(9)                                                                                                      |
| β                                                           | 84.17(5)                                                                                                      |
| γ                                                           | 70.44(7)                                                                                                      |
| Volume/Å <sup>3</sup>                                       | 5137(8)                                                                                                       |
| Z                                                           | 8                                                                                                             |
| D <sub>c</sub> /g cm <sup>-3</sup>                          | 1.565                                                                                                         |
| μ/mm <sup>-1</sup>                                          | 3.840                                                                                                         |
| F(000)                                                      | 2384                                                                                                          |
| Limiting indices                                            | -8 ≤ h ≤ 15<br>-19 ≤ k ≤ 21<br>-37 ≤ l ≤ 37                                                                   |
| No. of reflections collected / unique                       | 23556 / 4580                                                                                                  |
| No. of data / restraints / parameters                       | 23556 / 624 / 925                                                                                             |
| Final R <sub>1</sub> , ωR <sub>2</sub> indices [I > 2 σ(I)] | 0.1132, 0.2392                                                                                                |
| R <sub>1</sub> , ωR <sub>2</sub> (all data)                 | 0.4531, 0.3834                                                                                                |
| Goodness of fit on F <sup>2</sup>                           | 0.906                                                                                                         |
| <b>CCDC No.</b>                                             | <b>1420614</b>                                                                                                |

**Table S2** Selected bond lengths (Å) and angles (°) for [<sup>n</sup>Bu<sub>2</sub>Sn{SeC<sub>4</sub>H(Me-4,6)<sub>2</sub>N<sub>2</sub>}<sub>2</sub>] (**3**).

| Molecule a  |           | Molecule b  |           | Molecule c  |           | Molecule d  |           |
|-------------|-----------|-------------|-----------|-------------|-----------|-------------|-----------|
| Sn1-Se1     | 2.609(4)  | Sn2-Se3     | 2.581(4)  | Sn3-Se5     | 2.599(4)  | Sn4-Se7     | 2.575(4)  |
| Sn1-Se2     | 2.601(4)  | Sn2-Se4     | 2.583(4)  | Sn3-Se6     | 2.595(4)  | Sn4-Se8     | 2.582(4)  |
| Sn1-N1      | 2.747(13) | Sn2-N5      | 2.844(16) | Sn3-N11     | 2.778(16) | Sn4-N15     | 2.979(16) |
| Sn1-N3      | 2.722(16) | Sn2-N7      | 3.042(18) | Sn3-N9      | 2.732(17) | Sn4-N13     | 2.885(16) |
| Sn1-C13     | 2.09(3)   | Sn2-C33     | 2.25(3)   | Sn3-C53     | 2.12(3)   | Sn4-C73     | 2.05(2)   |
| Sn1-C17     | 2.18(2)   | Sn2-C37     | 2.15(2)   | Sn3-C57     | 2.17(2)   | Sn4-C77     | 2.12(2)   |
| Se1-C7      | 1.769(14) | Se3-C21     | 1.801(13) | Se5-C41     | 1.815(14) | Se7-C61     | 1.812(15) |
| Se2-C1      | 1.806(11) | Se4-C27     | 1.800(14) | Se6-C47     | 1.832(14) | Se8-C67     | 1.812(13) |
|             |           |             |           |             |           |             |           |
| Se1-Sn1-Se2 | 91.43(15) | Se3-Sn2-Se4 | 89.68(12) | Se5-Sn3-Se6 | 92.49(16) | Se7-Sn4-Se8 | 90.26(12) |
| Se1-Sn1-N1  | 153.0(4)  | Se4-Sn2-N5  | 150.8(4)  | Se5-Sn3-N9  | 154.2(5)  | Se8-Sn4-N13 | 59.9(4)   |
| Se1-Sn1-N3  | 61.1(4)   | Se4-Sn2-N7  | 58.6(4)   | Se5-Sn3-N11 | 61.1(4)   | Se8-Sn4-N15 | 149.6(3)  |
| Se2-Sn1-N3  | 152.4(4)  | Se3-Sn2-N7  | 148.3(4)  | Se6-Sn3-N11 | 153.5(4)  | Se7-Sn4-N15 | 59.6(3)   |
| C13-Sn1-C17 | 126.9(11) | C37-Sn2-C33 | 126.0(10) | C57-Sn3-C53 | 125.5(11) | C73-Sn4-C77 | 125.6(11) |
| C13-Sn1-Se2 | 110.3(8)  | C37-Sn2-Se3 | 111.5(6)  | C57-Sn3-Se6 | 108.7(7)  | C73-Sn4-Se7 | 107.5(9)  |
| C17-Sn1-Se2 | 106.7(7)  | C33-Sn2-Se3 | 109.2(9)  | C53-Sn3-Se6 | 109.9(8)  | C77-Sn4-Se7 | 111.3(8)  |
| C13-Sn1-Se1 | 105.5(9)  | C37-Sn2-Se4 | 109.3(7)  | C57-Sn3-Se5 | 106.9(6)  | C73-Sn4-Se8 | 108.1(8)  |
| C17-Sn1-Se1 | 110.4(5)  | C33-Sn2-Se4 | 104.8(10) | C53-Sn3-Se5 | 108.2(9)  | C77-Sn4-Se8 | 108.3(7)  |
| C7-Se1-Sn1  | 88.4(7)   | C21-Se3-Sn2 | 89.8(6)   | C41-Se5-Sn3 | 89.6(6)   | C61-Se7-Sn4 | 92.9(6)   |
| C1-Se2-Sn1  | 88.3(6)   | C27-Se4-Sn2 | 94.3(7)   | C47-Se6-Sn3 | 88.7(8)   | C67-Se8-Sn4 | 91.6(7)   |
| N1-Sn1-N3   | 145.9(6)  | N5-Sn2-N7   | 150.5(5)  | N9-Sn3-N11  | 144.7(6)  | N13-Sn4-N15 | 150.5(5)  |
| C13-Sn1-N1  | 84.6(9)   | C37-Sn2-N5  | 84.6(8)   | C57-Sn3-N9  | 84.9(7)   | C73-Sn4-N13 | 80.9(10)  |
| C17-Sn1-N1  | 80.8(6)   | C33-Sn2-N5  | 85.3(11)  | C53-Sn3-N9  | 81.1(10)  | C77-Sn4-N13 | 84.0(8)   |
| C13-Sn1-N3  | 81.3(8)   | C37-Sn2-N7  | 81.6(7)   | C57-Sn3-N11 | 80.8(7)   | C73-Sn4-N15 | 86.8(9)   |
| C17-Sn1-N3  | 83.2(7)   | C33-Sn2-N7  | 81.9(10)  | C53-Sn3-N11 | 80.8(7)   | C77-Sn4-N15 | 81.6(8)   |

**Table S3** XRD data for tin selenide nanosheets

| S. No. | Complex                                                                                                               | Duration of reaction in OLA | 2 $\theta$                                                                        | Corresponding plane                                                                     | Lattice parameter | JCPDS File No. |
|--------|-----------------------------------------------------------------------------------------------------------------------|-----------------------------|-----------------------------------------------------------------------------------|-----------------------------------------------------------------------------------------|-------------------|----------------|
| 1      | [Et <sub>2</sub> Sn{SeC <sub>4</sub> H(Me-4,6) <sub>2</sub> N <sub>2</sub> } <sub>2</sub> ]( <b>2</b> )               | 2                           | 14.36, 27.81, 30.72, 39.97, 44.15, 45.98, 47.76, 50.01, 52.52, 54.72, 57.79       | (009), (104), (109), (1018), (0027), (0028), (111), (119), (1113), (0033), (209)        | 3.811, 55.22(8)   | 40-1465        |
| 2      |                                                                                                                       | 5                           | 14.35, 28.18, 29.70, 30.73, 40.05, 41.33, 44.00, 47.84, 52.00, 55.74, 57.87       | (009), (105), (108), (109), (1018), (1019), (1021), (110), (1112), (202), (209)         | 3.811, 55.21(40)  | 40-1465        |
| 3      |                                                                                                                       | 10                          | 14.35, 27.07, 29.08, 30.70, 40.09, 44.12, 47.76, 50.08, 52.60, 57.86              | (001), (100), (002), (101), (102), (003), (110), (111), (103), (201)                    | 3.810, 6.141(7)   | 23-0602        |
| 4      | [ <sup>n</sup> Bu <sub>2</sub> Sn{SeC <sub>4</sub> H(Me-4,6) <sub>2</sub> N <sub>2</sub> } <sub>2</sub> ]( <b>3</b> ) | 2                           | 14.47, 27.05, 29.73, 30.73, 40.20, 41.30, 44.16, 45.29, 47.69, 49.94, 57.86       | (009), (101), (108), (109), (1018), (1019), (0027), (1022), (110), (119), (209)         | 3.811, 54.99(31)  | 40-1465        |
| 5      |                                                                                                                       | 5                           | 14.47, 27.05, 29.7, 30.73, 40.05, 41.18, 43.70, 45.29, 47.69, 52.49, 55.89, 57.87 | (009), (101), (108), (109), (1018), (1019), (1021), (1022), (110), (1113), (203), (209) | 3.811, 55.15(32)  | 40-1465        |
| 6      |                                                                                                                       | 10                          | 14.35, 29.00, 30.70, 40.09, 44.12, 47.66, 52.60                                   | (001), (002), (101), (102), (003), (110), (103)                                         | 3810, 6.147(6).   | 23-0602        |
| 7      | [ <sup>t</sup> Bu <sub>2</sub> Sn{SeC <sub>4</sub> H(Me-4,6) <sub>2</sub> N <sub>2</sub> } <sub>2</sub> ]( <b>4</b> ) | 2                           | 14.46, 30.80, 40.14, 47.77, 50.06, 52.61, 57.82                                   | (009), (109), (1018), (111), (119), (1113), (209)                                       | 3.811, 55.24(17)  | 40-1465        |
| 8      |                                                                                                                       | 5                           | 14.36, 27.08, 30.72, 40.17, 44.35, 47.79, 50.16, 52.52, 57.78                     | (009), (101), (109), (1018), (0027), (110), (119), (1113), (209)                        | 3.811, 55.19(16)  | 40-1465        |
| 9      |                                                                                                                       | 10                          | 14.35, 30.7, 40.09, 44.3, 47.7, 50.08, 52.60, 57.86                               | (001), (101), (102), (003), (110), (111), (103), (201)                                  | 3811, 6.146(6)    | 23-0602        |
